# Supplementary figures and images for: Regulation of COX-2 expression by miR-146a in lung cancer cells
Source: PubMed Central journal article supplement — RNA. 2014 Sep;20(9):1419–30. doi: 10.1261/rna.044149.113 (PMC4138325; doi:10.1261/rna.044149.113), 2014-09

Supplemental Figure 1

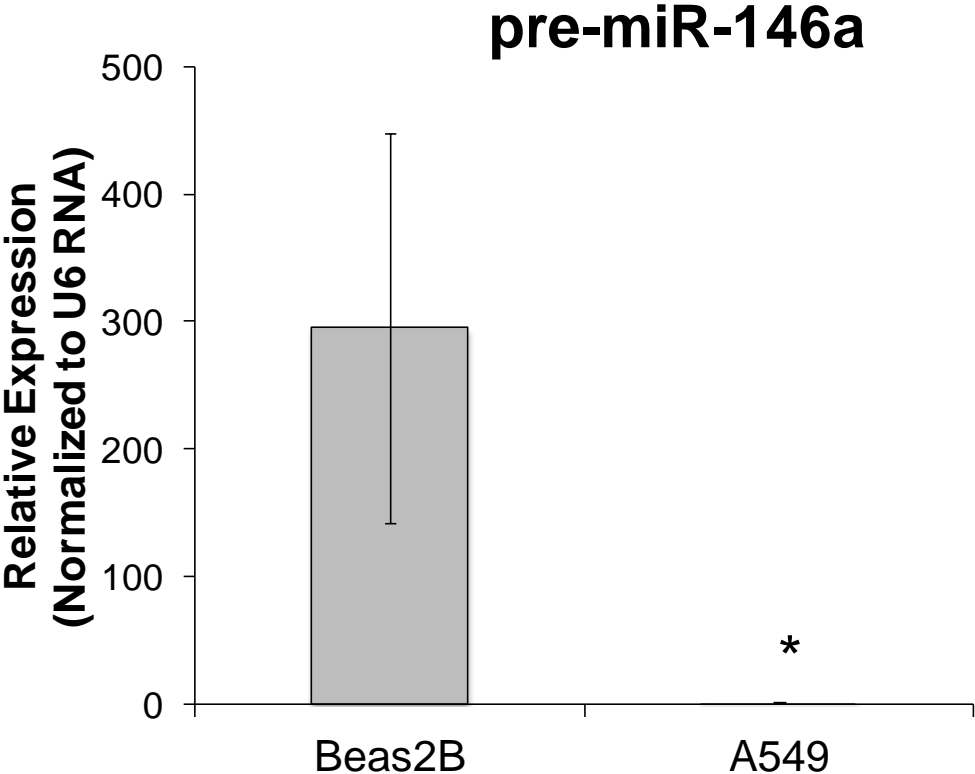

Supplement: supp_044149.113_SuppFig1.pdf [file supp_044149.113_SuppFig1.pdf]

Supplemental Figure 2

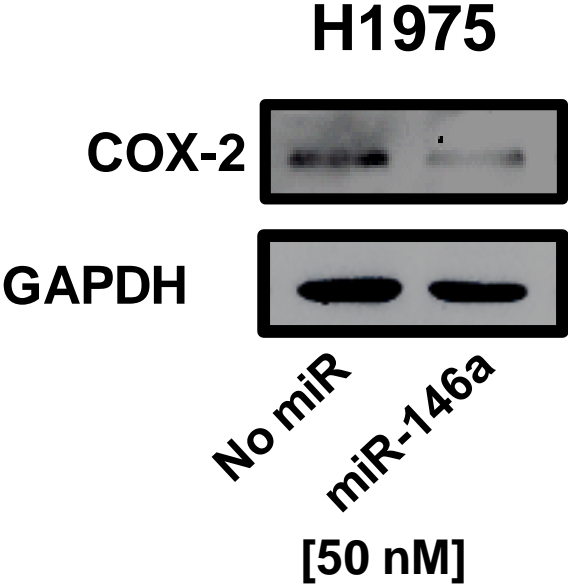

Supplement: supp_044149.113_SuppFig2.pdf [file supp_044149.113_SuppFig2.pdf]

# Supplemental Figure 3

## COX-2 mRNA

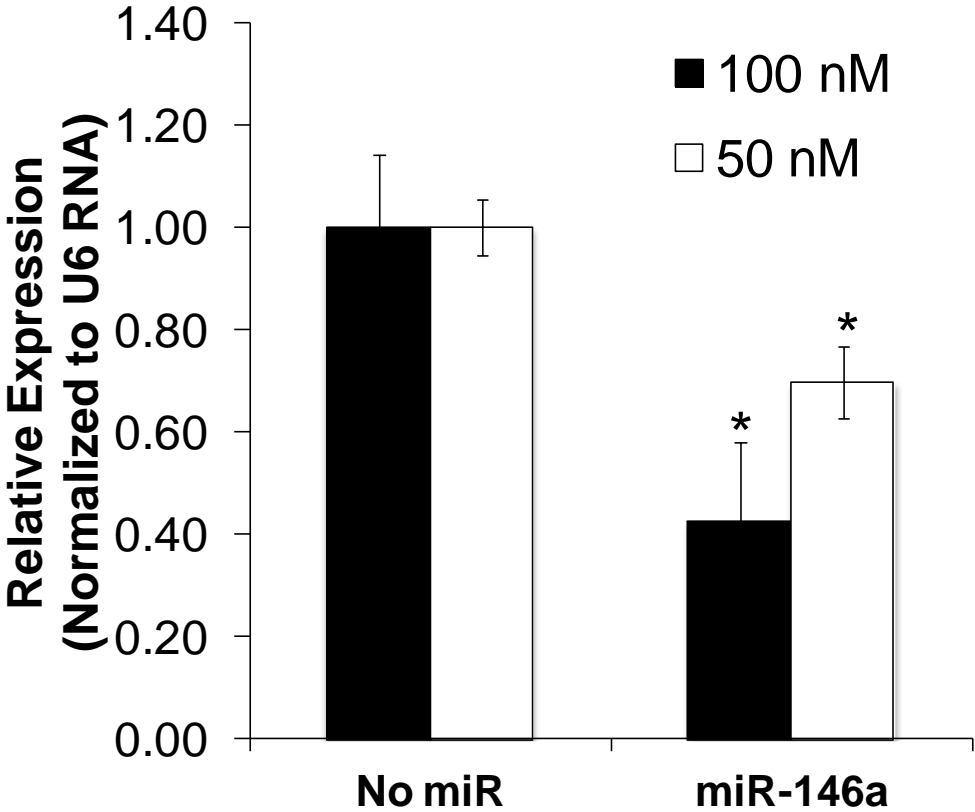

Supplement: supp_044149.113_SuppFig3.pdf [file supp_044149.113_SuppFig3.pdf]
